# Supplementary material for: Structural and biochemical insight into the mechanism of dual CpG site binding and methylation by the DNMT3A DNA methyltransferase
Source: PubMed Central journal article supplement — Nucleic Acids Res. 2021 Jul 21;49(14):8294–308. doi: 10.1093/nar/gkab600 (PMC8373138; doi:10.1093/nar/gkab600), 2021-07-21
Supplement: gkab600_supplemental_file.pdf [file gkab600_supplemental_file.pdf]

# Structural and biochemical insight into the mechanism of dual CpG site binding and methylation by the DNMT3A DNA methyltransferase

Max Emperle<sup>#</sup>, Disha M. Bangalore<sup>#</sup>, Sabrina Adam, Stefan Kunert, Hannah S. Heil, Katrin G. Heinze, Pavel Bashtrykov, Ingrid Tessmer\*, & Albert Jeltsch\*

## Supplemental information

### Supplemental text

Supplemental text S1: Automated SFM image analysis.

### Supplemental figures

Supplemental figure S1: Enzyme preparations and methylation of substrate libraries by DNMT3A and DNMT3A/3L.

Supplemental figure S2: Schematic figure of the SFM DNA substrates.

Supplemental figure S3: Additional SFM data obtained with free DNA.

Supplemental figure S4: Analysis of MM co-methylation.

Supplemental figure S5: Comparison of flanking sequence preferences of DNMT3A extracted from the MW co-methylation data with previously published flanking specificity data of DNMT3A.

Supplemental figure S6: Total DNA length distributions.

Supplemental figure S7: Height and length distributions of single heterotetramers bound to the D6, D9 and D12 substrates.

Supplemental figure S8: Detail of the side-by-side DNMT3A/3L model.

Supplemental figure S9: Statistical analysis of the distribution of co-methylation events by DNMT3A.

Supplemental figure S10: Statistical analysis of the distribution of co-methylation events by DNMT3A/3L.

Supplemental figure S11: Side-by-side DNMT3A/3L model explaining two tetramer complexes binding to the D12 substrate.

### Supplemental tables

Supplemental table S1. Sequences of the oligonucleotide substrates used in this study.

Supplemental table S2: Total number of NGS reads in the different experiments conducted at different concentrations of DNMT3A and DNMT3A/3L and in the no-enzyme control reaction.

Supplemental table S3: Total number of co-methylation events in the different experiments conducted with DNMT3A and DNMT3A/3L.

## Supplemental text

**Supplemental text S1: Automated SFM image analysis.** For automated analyses of protein positions on the DNA and DNA bend angles in the protein-DNA complexes, we developed a MatLab tool that represents an extension to our previous automated DNA bend angle analysis routine (1). The MatLab script is available at Open Science Foundation (OSF) (<https://osf.io/76e9s/>). SFM images of protein-DNA samples were processed in the SFM (MFP-3D) software (plane fitted and flattened to 3<sup>rd</sup> order) and exported in Tiff format for further analysis. The images were cropped to remove the frame in the original Tiff exports. The resulting images were loaded into ImageJ (2) for selection of DNA substrates by a height cut-off filter. Selected DNAs were then skeletonized in FIESTA software (3) by 2 nm segment lines along the center of the DNA strands obtained by a Gaussian fit through sections along the DNA contours. Segmented skeletons were then smoothed by interpolation in our MatLab script. In parallel, protein peaks in the images were located in ImageJ by a height cut-off filter and the application of the object counter function. The obtained protein peak coordinates were then fed into MatLab together with the DNA skeleton lines.

The MatLab script determines DNA-bound proteins by using a selection criterion of maximum allowed distance between peak centers (peak coordinates) and DNA skeleton lines. This cut-off distance is determined as the sum of the peak radii for unbound proteins in the images (measured manually in ImageJ, 10 nm for DNMT3A/3L molecules in our images) and the DNA full maximum half width (FMHW) from the Gaussian section fits in the FIESTA skeletonization procedure (see above). Complete lengths of skeleton lines (DNA contour lengths) were also simultaneously measured and only DNAs with the correct length were included in the further analyses to exclude broken DNAs in which the position of the CpGs would deviate from the 50% DNA length position. Theoretical DNA length was calculated based on the number of base pairs (0.34 nm/bp) and all lengths within two standard deviations from the center of the distribution of measured lengths around this theoretical value were allowed (>122 nm for the ~400 bp fragments in these studies, see Supplemental figure S4 for DNA length distributions). Since the two ends of our DNA are indistinguishable (because they are not labeled in our substrates), the MatLab script measures the distance from the center of protein peaks to the closer DNA end. Protein positions were thus plotted to 50% of DNA length (folded over at the center of the DNA substrates) using Origin software (OriginLab Corporation, Northampton, USA). DNA bend angles are measured by the script selectively at each of the protein positions on DNA. Protein peak positions are output correlated with their respective DNA bend angles. Protein peaks are also numbered in an output image to allow further correlated volume measurements for the individual protein complexes on the DNA.

## Supplemental figures and figure legends

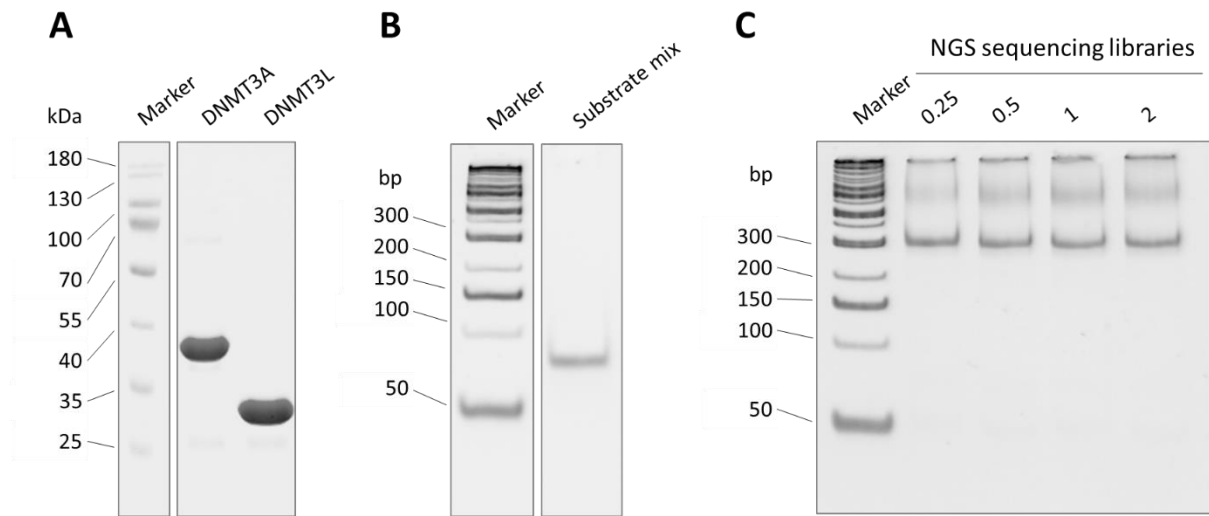

**Supplemental figure S1: Enzyme preparations and methylation of substrate libraries by DNMT3A and DNMT3A/3L.** **A)** Examples of the purified DNMT3A and DNMT3L proteins. The figure shows a 12% SDS polyacrylamide gel stained with Coomassie BB. All lanes were taken from the same gel. **B)** Examples of the mixtures of all substrates used for the methylation reactions. The image shows a 10% polyacrylamide gel run in TPE and stained with GelRed. Both lanes were taken from the same gel. **C)** Examples of the final sequencing libraries after bisulfite conversion, hairpin ligation, and the two PCR steps adding barcodes and indices used for Illumina NGS sequencing. In this picture, the samples related to the DNMT3A methylation reactions are shown. The image shows a 10% polyacrylamide gel run in TPE and stained with GelRed.

**A**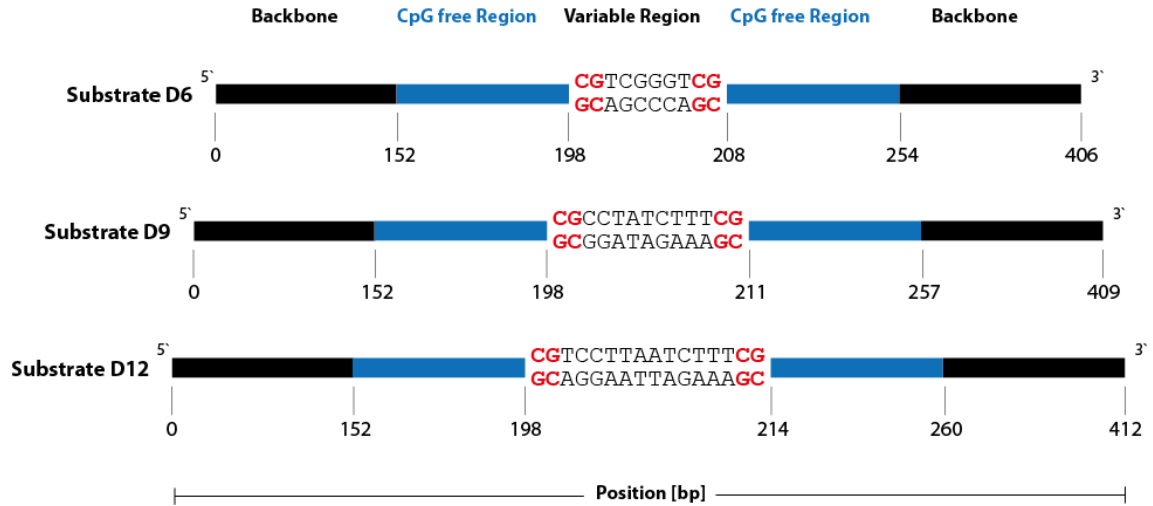**B****Sequence of substrate D12**

```

TTTACACTTTATGCTTCCGGCTCGTATGTTGTGTGGAATTGTGAGCGGAT      50
AACAAATTTACACAGGAAACAGCTATGACCATGATTACGCCAAGCTTGGT      100
ACCGAGCTCGGATCCACTAGTAACGGCCGCCAGTGTGCTGGAATTCGCCC      150
TTAAAAGGAGGCCATTAGAGTCCTGTCTCTGTTTGATGGAATTGCAACG      200
TCCTTAATCTTTCGGGTACTTGGTGCTCAAGGAGTTGGGTATTAAAGTG      250
GAAAAGTACTAAGGGCGAATTCTGCAGATATCCATCACACTGGCGGCCGC      300
TCGAGCATGCATCTAGAGGGCCAATTCGCCCTATAGTGAGTCGTATTAC      350
AATTCACTGGCCGTCGTTTTACAACGTCGTGACTGGGAAAACCCTGGCGT      400
TACCCAACTTAA

```

**C**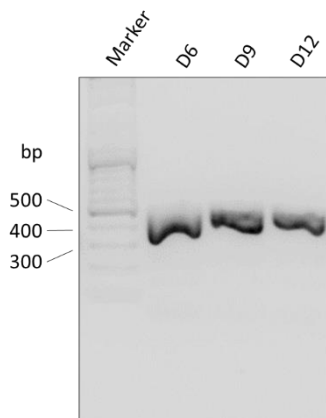

**Supplemental figure S2: Schematic figure of the SFM DNA substrates. A)** General design and sequences of the central pair of CpG sites (colored in red) in the D6, D9 and D12 substrates. **B)** Sequence of the D12 substrate as an example. The central pair of CpG sites is shaded in grey and the CpG free region is colored in blue. CpG sites are colored in red. **C)** Gel images of the purified SFM substrates. The image shows a 10% polyacrylamide gel run in TPE and stained with GelRed.

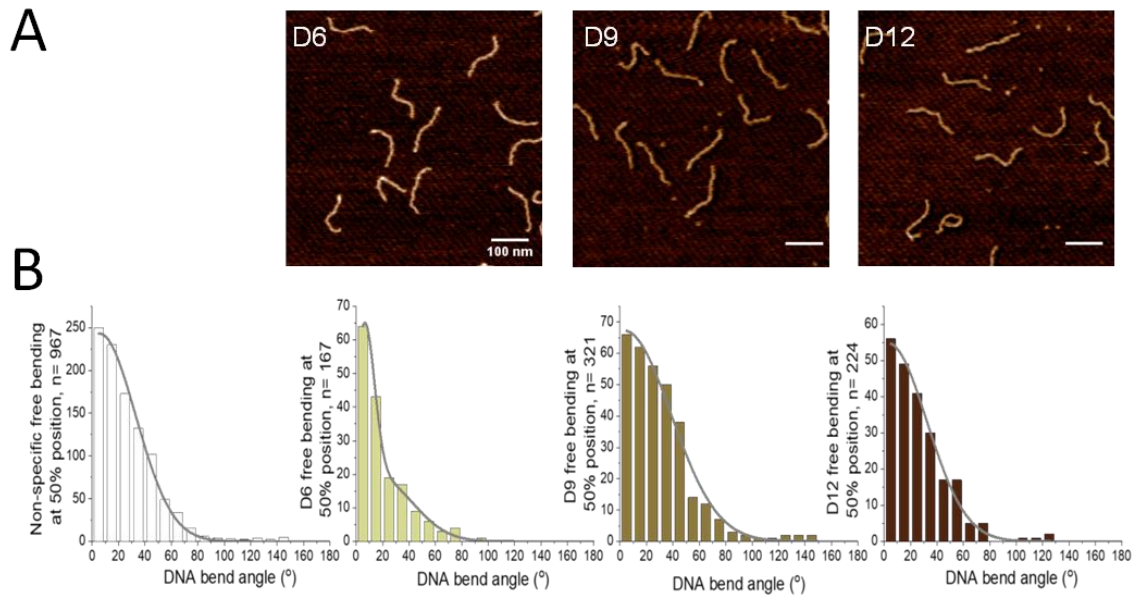

**Supplemental figure S3: Additional SFM data obtained with free DNA. A)** SFM images of D6, D9 and D12 DNA substrates captured in the absence of protein. **B)** DNA bending angles in free DNA. The three colored histograms show bending of the D6, D9, and D12 substrates at 50% of the DNA length in the absence of protein. The white bars show bending of DNA at non-specific sites (left panel, taken from (1)). All distributions are similar to standard B-form DNA indicating that no intrinsic DNA bending is induced by the CpG pairs.

MM co-methylation

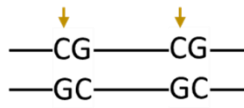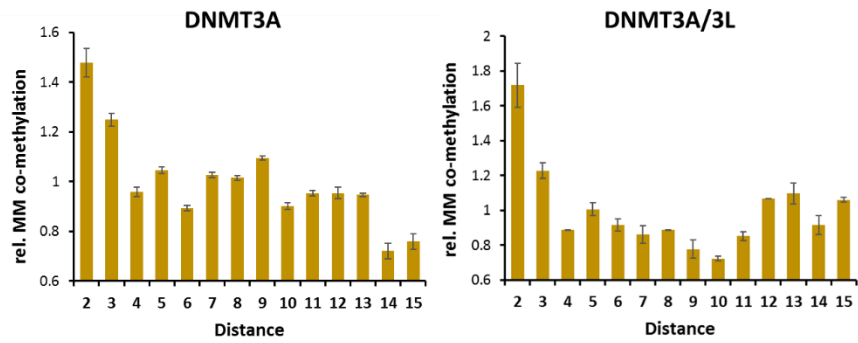

**Supplemental figure S4: Analysis of MM co-methylation. Frequencies of MM co-methylation of CpG sites in variable distances.** The DNMT3A data show averages of 4 normalized experiments at different enzyme concentrations. The DNMT3A/3L data show averages of 2 normalized experiments at different enzyme concentrations. In each case, the error bars show the SEM.

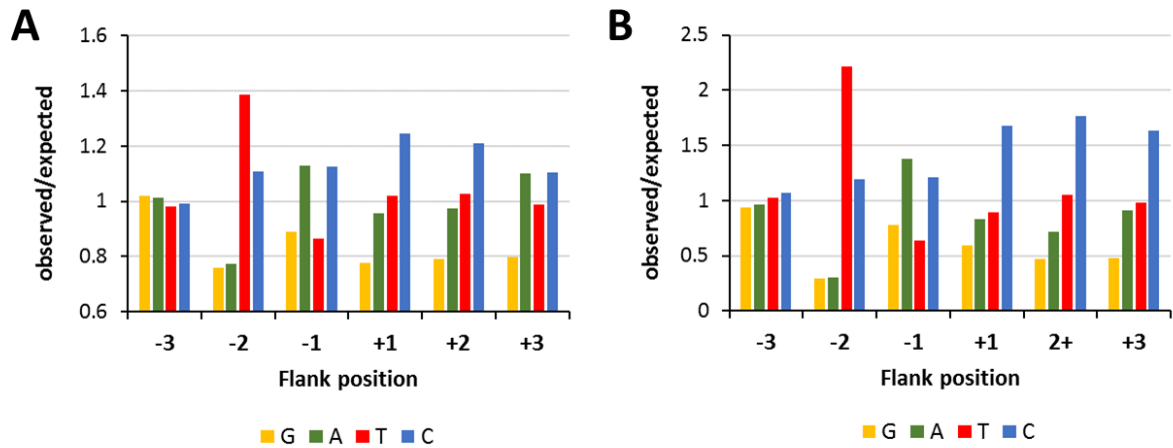

**Supplemental figure S5: Comparison of flanking sequence preferences of DNMT3A extracted from the MW co-methylation data with previously published flanking specificity data of DNMT3A (4). A)** Averaged observed/expected frequencies of all nucleotides flanking methylated sites in substrates with MW co-methylation in distances of 9-15 base pairs. **B)** Observed/expected frequencies of all bases in the 25% most preferred NNKCGNNN flanks observed by Gao et al. (2020). The graph was recalculated based on the published data.

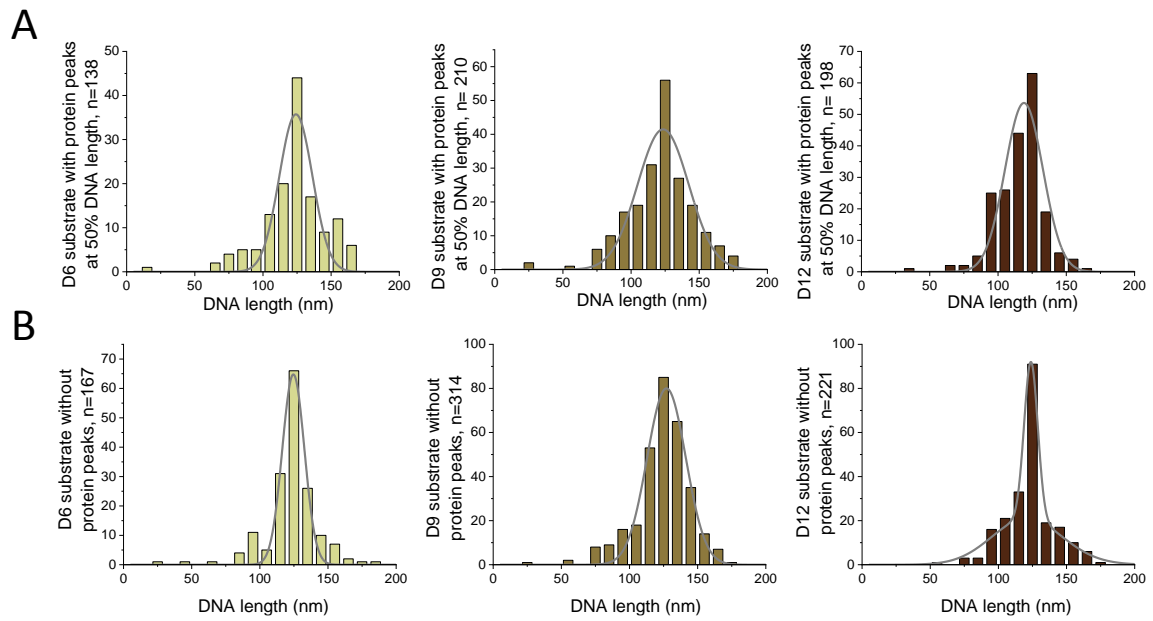

**Supplemental figure S6: Total DNA length distributions. A)** DNMT3A/3L complexes bound at the 50% position and **B)** unbound DNA for the three DNA substrates D6, D9, and D12. All values were determined by the MatLab routine.



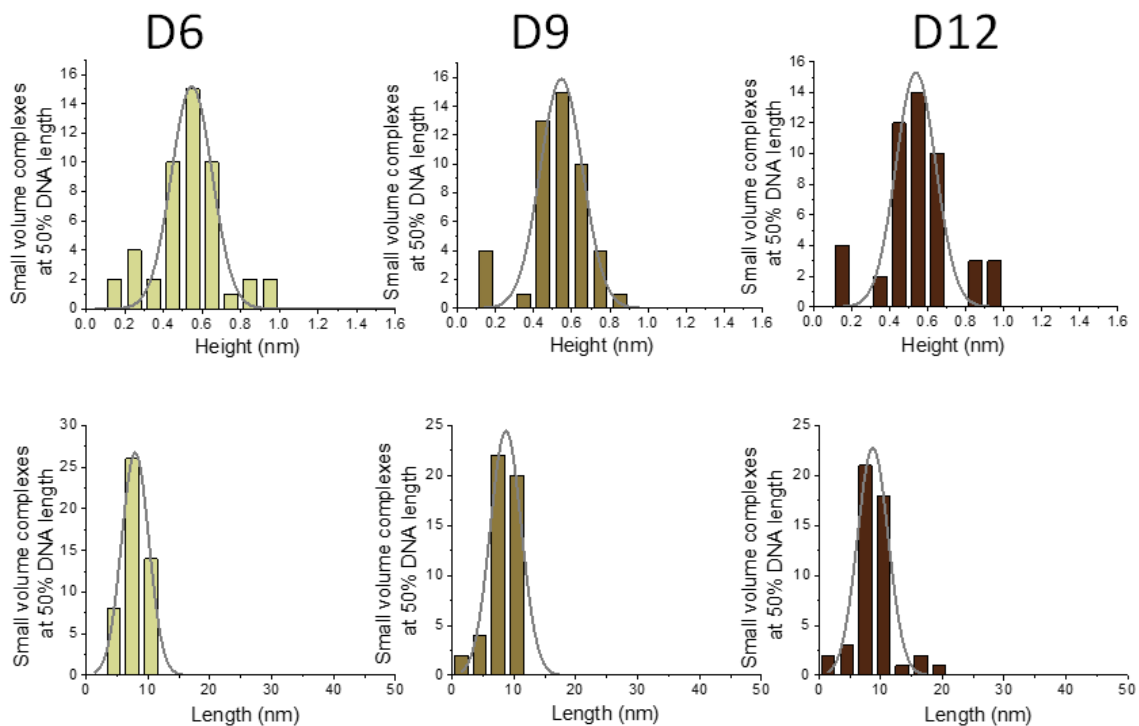

**Supplemental figure S7: Height and length distributions of single DNMT3A/3L heterotetramers bound to the D6, D9 and D12 substrates.** In each case, complexes with volumes of  $\sim 100 \text{ nm}^3$  corresponding to single heterotetramers were selected and analyzed separately. The average lengths and heights of the different DNA bound complexes are  $8.4 \pm 0.4 \text{ nm}$  and  $0.54 \pm 0.01 \text{ nm}$ , respectively, with standard deviations given for comparison between the different substrates.

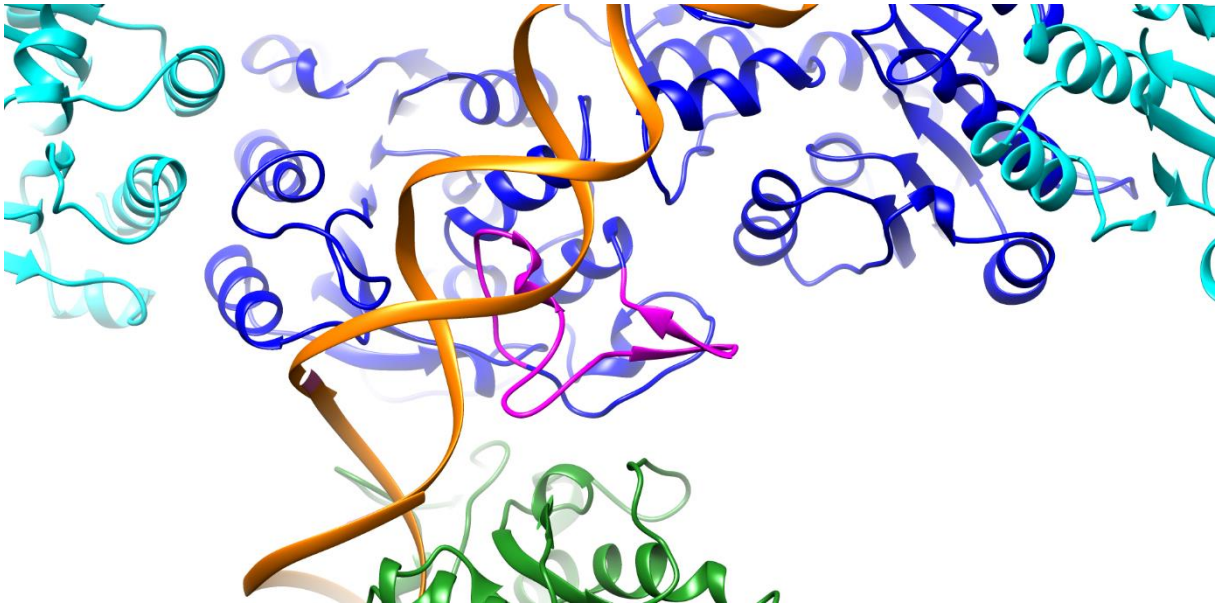

**Supplemental figure S8: Detail of the side-by-side DNMT3A/3L model.** The figure shows an enlargement of the complex shown in Figure 8C with a loop (R831-K855) identified to be involved in the multimerization of DNMT3A on DNA in a previous study (5) highlighted in magenta in one of the blue DNMT3A subunits of complex one, showing that it approaches one of the DNMT3A subunits in complex 2 (green).

### MM co-methylation

| Distance | 2       | 3       | 4       | 5       | 6       | 7       | 8       | 9       | 10      | 11      | 12      | 13      | 14      | 15 |
|----------|---------|---------|---------|---------|---------|---------|---------|---------|---------|---------|---------|---------|---------|----|
| 2        | 1       |         |         |         |         |         |         |         |         |         |         |         |         |    |
| 3        | 1.5E-02 | 1       |         |         |         |         |         |         |         |         |         |         |         |    |
| 4        | 1.1E-03 | 1.6E-04 | 1       |         |         |         |         |         |         |         |         |         |         |    |
| 5        | 1.8E-03 | 1.1E-03 | 5.7E-03 | 1       |         |         |         |         |         |         |         |         |         |    |
| 6        | 8.0E-04 | 8.7E-05 | 7.1E-03 | 4.2E-04 | 1       |         |         |         |         |         |         |         |         |    |
| 7        | 1.6E-03 | 4.4E-04 | 4.4E-02 | 7.0E-02 | 4.6E-04 | 1       |         |         |         |         |         |         |         |    |
| 8        | 2.0E-03 | 7.2E-04 | 6.9E-02 | 3.5E-02 | 3.7E-04 | 5.3E-01 | 1       |         |         |         |         |         |         |    |
| 9        | 2.1E-03 | 7.8E-04 | 9.0E-03 | 2.6E-01 | 1.5E-04 | 2.6E-01 | 7.9E-02 | 1       |         |         |         |         |         |    |
| 10       | 3.6E-04 | 1.6E-05 | 1.4E-03 | 1.0E-04 | 4.8E-02 | 2.5E-04 | 5.4E-04 | 1.4E-04 | 1       |         |         |         |         |    |
| 11       | 6.3E-04 | 4.7E-05 | 4.5E-03 | 2.6E-04 | 5.3E-01 | 4.0E-04 | 5.3E-04 | 1.5E-04 | 1.2E-01 | 1       |         |         |         |    |
| 12       | 3.1E-04 | 4.9E-05 | 8.1E-02 | 2.0E-03 | 5.9E-01 | 1.1E-02 | 1.8E-02 | 5.3E-03 | 6.1E-02 | 3.6E-01 | 1       |         |         |    |
| 13       | 1.1E-03 | 4.2E-04 | 5.0E-03 | 1.3E-03 | 1.8E-01 | 1.0E-03 | 2.2E-04 | 4.8E-04 | 1.5E-01 | 6.1E-01 | 2.3E-01 | 1       |         |    |
| 14       | 2.5E-05 | 9.6E-06 | 6.5E-04 | 1.1E-04 | 2.4E-03 | 4.1E-04 | 8.1E-04 | 3.6E-04 | 4.3E-03 | 2.4E-03 | 8.6E-04 | 5.7E-03 | 1       |    |
| 15       | 4.2E-05 | 1.7E-05 | 1.7E-03 | 2.4E-04 | 7.9E-03 | 8.8E-04 | 1.6E-03 | 7.3E-04 | 2.6E-02 | 9.4E-03 | 4.0E-03 | 1.7E-02 | 1.5E-01 | 1  |

| p-value |
|---------|
| >0.05   |
| <0.05   |
| <1E-02  |
| <1E-03  |

Global probability of observing 74 of the 91 pairwise comparisons with p<0.05: p<10<sup>-99</sup>

### MW co-methylation

| Distance | 2       | 3       | 4       | 5       | 6       | 7       | 8       | 9       | 10      | 11      | 12      | 13      | 14      | 15 |
|----------|---------|---------|---------|---------|---------|---------|---------|---------|---------|---------|---------|---------|---------|----|
| 2        | 1       |         |         |         |         |         |         |         |         |         |         |         |         |    |
| 3        | 2.4E-03 | 1       |         |         |         |         |         |         |         |         |         |         |         |    |
| 4        | 3.4E-05 | 1.0E-02 | 1       |         |         |         |         |         |         |         |         |         |         |    |
| 5        | 2.2E-05 | 3.3E-02 | 2.1E-01 | 1       |         |         |         |         |         |         |         |         |         |    |
| 6        | 1.4E-05 | 7.8E-03 | 8.1E-01 | 1.2E-01 | 1       |         |         |         |         |         |         |         |         |    |
| 7        | 6.5E-03 | 6.9E-02 | 1.7E-03 | 1.0E-03 | 9.2E-04 | 1       |         |         |         |         |         |         |         |    |
| 8        | 8.1E-02 | 2.7E-02 | 5.1E-04 | 1.4E-03 | 4.8E-04 | 2.7E-01 | 1       |         |         |         |         |         |         |    |
| 9        | 1.3E-01 | 5.9E-03 | 1.8E-03 | 3.4E-03 | 2.0E-03 | 2.6E-02 | 3.4E-02 | 1       |         |         |         |         |         |    |
| 10       | 5.8E-04 | 4.5E-01 | 1.3E-03 | 1.8E-03 | 5.6E-04 | 5.1E-02 | 4.3E-02 | 1.1E-02 | 1       |         |         |         |         |    |
| 11       | 6.4E-03 | 4.1E-02 | 6.2E-04 | 2.1E-04 | 2.3E-04 | 2.2E-01 | 4.8E-01 | 3.0E-02 | 2.1E-02 | 1       |         |         |         |    |
| 12       | 1.5E-02 | 3.0E-04 | 5.9E-05 | 1.9E-04 | 7.8E-05 | 4.2E-03 | 2.7E-03 | 6.3E-01 | 7.4E-04 | 3.8E-03 | 1       |         |         |    |
| 13       | 3.0E-02 | 8.1E-04 | 1.6E-05 | 4.0E-06 | 5.1E-06 | 7.2E-04 | 9.2E-03 | 4.8E-01 | 5.9E-05 | 2.5E-04 | 9.8E-02 | 1       |         |    |
| 14       | 4.9E-01 | 1.5E-03 | 5.6E-05 | 1.4E-04 | 5.4E-05 | 1.3E-02 | 4.6E-02 | 2.1E-01 | 1.6E-03 | 1.4E-02 | 3.1E-02 | 2.1E-01 | 1       |    |
| 15       | 4.0E-02 | 1.5E-02 | 1.2E-04 | 1.3E-04 | 5.9E-05 | 1.0E-01 | 8.8E-01 | 4.0E-02 | 9.6E-03 | 2.4E-01 | 3.1E-03 | 1.7E-03 | 3.2E-02 | 1  |

| p-value |
|---------|
| >0.05   |
| <0.05   |
| <1E-02  |
| <1E-03  |

Global probability of observing 71 of the 91 pairwise comparisons with p<0.05: p<10<sup>-99</sup>

### WM co-methylation

| Distance | 2       | 3       | 4       | 5       | 6       | 7       | 8       | 9       | 10      | 11      | 12      | 13      | 14      | 15 |
|----------|---------|---------|---------|---------|---------|---------|---------|---------|---------|---------|---------|---------|---------|----|
| 2        | 1       |         |         |         |         |         |         |         |         |         |         |         |         |    |
| 3        | 8.2E-01 | 1       |         |         |         |         |         |         |         |         |         |         |         |    |
| 4        | 1.7E-02 | 2.0E-02 | 1       |         |         |         |         |         |         |         |         |         |         |    |
| 5        | 1.7E-01 | 2.3E-01 | 5.8E-01 | 1       |         |         |         |         |         |         |         |         |         |    |
| 6        | 2.8E-02 | 3.6E-02 | 3.1E-01 | 6.0E-02 | 1       |         |         |         |         |         |         |         |         |    |
| 7        | 1.7E-03 | 1.8E-03 | 9.4E-04 | 1.9E-03 | 9.1E-03 | 1       |         |         |         |         |         |         |         |    |
| 8        | 1.3E-02 | 1.4E-02 | 3.3E-04 | 3.2E-04 | 1.6E-01 | 3.2E-02 | 1       |         |         |         |         |         |         |    |
| 9        | 2.1E-03 | 2.1E-03 | 3.6E-04 | 4.9E-06 | 2.2E-03 | 1.7E-01 | 2.1E-04 | 1       |         |         |         |         |         |    |
| 10       | 2.1E-04 | 2.0E-04 | 1.3E-03 | 3.2E-04 | 2.6E-04 | 7.6E-03 | 1.1E-03 | 2.6E-02 | 1       |         |         |         |         |    |
| 11       | 2.2E-04 | 2.1E-04 | 9.4E-04 | 3.6E-05 | 7.7E-05 | 1.5E-03 | 9.7E-05 | 2.1E-03 | 2.6E-01 | 1       |         |         |         |    |
| 12       | 3.7E-05 | 3.4E-05 | 9.4E-04 | 8.7E-05 | 2.1E-05 | 1.7E-04 | 1.4E-04 | 7.7E-04 | 4.9E-03 | 1.3E-02 | 1       |         |         |    |
| 13       | 1.0E-04 | 9.3E-05 | 2.2E-04 | 3.0E-07 | 1.1E-05 | 5.2E-05 | 4.3E-07 | 2.7E-06 | 5.4E-04 | 2.6E-04 | 4.0E-02 | 1       |         |    |
| 14       | 2.7E-05 | 2.3E-05 | 9.4E-04 | 1.1E-06 | 1.7E-06 | 6.6E-06 | 8.3E-07 | 2.9E-06 | 4.7E-05 | 1.8E-05 | 9.2E-04 | 1.8E-03 | 1       |    |
| 15       | 6.6E-05 | 5.8E-05 | 1.8E-06 | 3.0E-06 | 7.0E-06 | 4.1E-05 | 3.5E-06 | 2.0E-05 | 6.2E-04 | 4.9E-04 | 9.5E-02 | 4.1E-01 | 1.2E-03 | 1  |

| p-value |
|---------|
| >0.05   |
| <0.05   |
| <1E-02  |
| <1E-03  |

Global probability of observing 80 of the 91 pairwise comparisons with p<0.05: p<10<sup>-99</sup>

**Supplemental figure S9: Analysis of the distribution of co-methylation events by DNMT3A.** A model assuming co-methylation occurred by independent events would predict equal probabilities of co-methylation in all distances. This model was evaluated by comparing the co-methylation frequencies by DNMT3A in the different distances by pairwise T-Tests using MS Excel using two-tailed and unequal variance (heteroscedastic) settings. P-values < 0.05 were taken as evidence for a significant difference that argues against an equal probability of co-methylation at all distances. For a global analysis, the probability of finding N or more pairwise comparisons with p-values below 0.05 was determined using a binomial distribution. Overall, these data demonstrate that the distribution of co-methylation events is not in agreement with a model assuming 2 co-methylation by independent events.

### MM co-methylation

| Distance | 2       | 3       | 4       | 5       | 6       | 7       | 8       | 9       | 10      | 11      | 12      | 13      | 14      | 15 |
|----------|---------|---------|---------|---------|---------|---------|---------|---------|---------|---------|---------|---------|---------|----|
| 2        | 1       |         |         |         |         |         |         |         |         |         |         |         |         |    |
| 3        | 1.4E-01 | 1       |         |         |         |         |         |         |         |         |         |         |         |    |
| 4        | 8.7E-02 | 1.5E-02 | 1       |         |         |         |         |         |         |         |         |         |         |    |
| 5        | 6.9E-02 | 1.5E-01 | 2.2E-01 | 1       |         |         |         |         |         |         |         |         |         |    |
| 6        | 6.8E-02 | 9.5E-02 | 3.1E-01 | 4.5E-01 | 1       |         |         |         |         |         |         |         |         |    |
| 7        | 3.9E-02 | 2.3E-01 | 9.5E-01 | 4.5E-01 | 6.2E-01 | 1       |         |         |         |         |         |         |         |    |
| 8        | 8.6E-02 | 2.5E-03 | 3.8E-01 | 2.3E-01 | 3.7E-01 | 8.7E-01 | 1       |         |         |         |         |         |         |    |
| 9        | 3.6E-02 | 7.9E-02 | 2.7E-01 | 7.9E-02 | 1.2E-01 | 5.1E-01 | 2.4E-01 | 1       |         |         |         |         |         |    |
| 10       | 6.4E-02 | 1.9E-02 | 1.1E-01 | 6.2E-02 | 6.4E-02 | 4.8E-01 | 6.2E-02 | 9.0E-01 | 1       |         |         |         |         |    |
| 11       | 4.9E-02 | 8.5E-02 | 6.7E-01 | 1.4E-01 | 2.6E-01 | 9.1E-01 | 5.4E-01 | 3.2E-01 | 2.3E-01 | 1       |         |         |         |    |
| 12       | 8.4E-02 | 2.7E-01 | 1.3E-01 | 3.2E-01 | 1.4E-01 | 3.0E-01 | 1.2E-01 | 4.9E-02 | 3.7E-02 | 6.9E-02 | 1       |         |         |    |
| 13       | 6.5E-02 | 6.1E-01 | 2.8E-01 | 5.1E-01 | 3.6E-01 | 2.8E-01 | 2.9E-01 | 1.3E-01 | 1.7E-01 | 2.1E-01 | 8.9E-01 | 1       |         |    |
| 14       | 8.9E-02 | 8.2E-03 | 5.6E-02 | 2.6E-01 | 4.3E-01 | 8.3E-01 | 5.3E-01 | 2.3E-01 | 8.8E-02 | 4.8E-01 | 1.4E-01 | 3.0E-01 | 1       |    |
| 15       | 1.0E-01 | 1.4E-01 | 7.7E-02 | 3.0E-01 | 1.2E-01 | 3.1E-01 | 5.3E-02 | 7.0E-02 | 1.0E-02 | 8.1E-02 | 9.5E-01 | 8.7E-01 | 8.4E-02 | 1  |

| p-value |
|---------|
| >0.05   |
| <0.05   |
| <1E-02  |
| <1E-03  |

Global probability of observing 10 of the 91 pairwise comparisons with p<0.05: p=0.0156

### MW co-methylation

| Distance | 2       | 3       | 4       | 5       | 6       | 7       | 8       | 9       | 10      | 11      | 12      | 13      | 14      | 15 |
|----------|---------|---------|---------|---------|---------|---------|---------|---------|---------|---------|---------|---------|---------|----|
| 2        | 1       |         |         |         |         |         |         |         |         |         |         |         |         |    |
| 3        | 5.9E-03 | 1       |         |         |         |         |         |         |         |         |         |         |         |    |
| 4        | 8.3E-03 | 3.5E-02 | 1       |         |         |         |         |         |         |         |         |         |         |    |
| 5        | 4.6E-02 | 2.1E-01 | 3.1E-01 | 1       |         |         |         |         |         |         |         |         |         |    |
| 6        | 1.7E-02 | 8.5E-02 | 3.4E-01 | 6.8E-01 | 1       |         |         |         |         |         |         |         |         |    |
| 7        | 7.2E-03 | 2.2E-01 | 4.2E-02 | 1.7E-01 | 8.1E-02 | 1       |         |         |         |         |         |         |         |    |
| 8        | 8.1E-02 | 5.3E-02 | 1.2E-02 | 4.7E-02 | 1.8E-02 | 1.0E-01 | 1       |         |         |         |         |         |         |    |
| 9        | 7.8E-02 | 4.9E-02 | 1.1E-02 | 4.7E-02 | 1.8E-02 | 9.6E-02 | 9.7E-01 | 1       |         |         |         |         |         |    |
| 10       | 6.7E-03 | 1.4E-01 | 3.1E-02 | 1.4E-01 | 6.5E-02 | 4.8E-01 | 1.1E-01 | 1.0E-01 | 1       |         |         |         |         |    |
| 11       | 7.2E-02 | 1.1E-01 | 1.9E-02 | 5.8E-02 | 2.7E-02 | 2.0E-01 | 4.2E-01 | 2.4E-01 | 2.4E-01 | 1       |         |         |         |    |
| 12       | 5.8E-02 | 3.0E-02 | 1.4E-02 | 7.3E-03 | 1.2E-02 | 4.0E-02 | 2.4E-02 | 2.5E-02 | 3.8E-02 | 1.8E-02 | 1       |         |         |    |
| 13       | 3.2E-02 | 1.2E-02 | 1.8E-02 | 4.4E-02 | 2.6E-02 | 2.9E-03 | 4.9E-02 | 4.8E-02 | 6.1E-03 | 5.2E-02 | 1.1E-01 | 1       |         |    |
| 14       | 2.3E-01 | 1.1E-01 | 3.1E-02 | 3.8E-02 | 3.3E-02 | 1.6E-01 | 6.4E-01 | 6.5E-01 | 1.7E-01 | 3.2E-01 | 1.7E-02 | 9.6E-02 | 1       |    |
| 15       | 9.6E-02 | 6.7E-02 | 1.4E-02 | 4.5E-02 | 2.0E-02 | 1.2E-01 | 9.7E-01 | 9.4E-01 | 1.3E-01 | 4.5E-01 | 2.1E-02 | 5.6E-02 | 6.3E-01 | 1  |

| p-value |
|---------|
| >0.05   |
| <0.05   |
| <1E-02  |
| <1E-03  |

Global probability of observing 44 of the 91 pairwise comparisons with p<0.05: p<10<sup>-99</sup>

### WM co-methylation

| Distance | 2       | 3       | 4       | 5       | 6       | 7       | 8       | 9       | 10      | 11      | 12      | 13      | 14      | 15 |
|----------|---------|---------|---------|---------|---------|---------|---------|---------|---------|---------|---------|---------|---------|----|
| 2        | 1       |         |         |         |         |         |         |         |         |         |         |         |         |    |
| 3        | 2.1E-01 | 1       |         |         |         |         |         |         |         |         |         |         |         |    |
| 4        | 1.2E-01 | 1.6E-02 | 1       |         |         |         |         |         |         |         |         |         |         |    |
| 5        | 2.1E-01 | 5.6E-01 | 6.2E-02 | 1       |         |         |         |         |         |         |         |         |         |    |
| 6        | 2.1E-01 | 7.3E-01 | 1.7E-02 | 4.7E-01 | 1       |         |         |         |         |         |         |         |         |    |
| 7        | 3.2E-02 | 1.2E-01 | 2.0E-01 | 8.6E-02 | 1.2E-01 | 1       |         |         |         |         |         |         |         |    |
| 8        | 4.5E-02 | 1.6E-02 | 2.9E-02 | 7.0E-03 | 2.4E-02 | 4.2E-01 | 1       |         |         |         |         |         |         |    |
| 9        | 6.8E-02 | 1.6E-02 | 2.3E-02 | 3.5E-02 | 1.1E-02 | 3.6E-01 | 5.4E-01 | 1       |         |         |         |         |         |    |
| 10       | 3.0E-02 | 6.2E-02 | 1.0E-01 | 3.2E-02 | 7.0E-02 | 7.5E-01 | 4.5E-01 | 3.4E-01 | 1       |         |         |         |         |    |
| 11       | 3.5E-02 | 6.1E-02 | 1.1E-01 | 3.0E-02 | 7.0E-02 | 9.8E-01 | 2.5E-01 | 2.4E-01 | 6.5E-01 | 1       |         |         |         |    |
| 12       | 3.5E-02 | 2.3E-02 | 3.7E-02 | 8.3E-03 | 3.1E-02 | 3.0E-01 | 4.8E-01 | 7.7E-01 | 2.7E-01 | 1.6E-01 | 1       |         |         |    |
| 13       | 2.8E-02 | 1.1E-01 | 1.6E-01 | 8.3E-02 | 1.1E-01 | 5.7E-01 | 8.7E-01 | 6.9E-01 | 7.2E-01 | 5.2E-01 | 6.2E-01 | 1       |         |    |
| 14       | 3.0E-02 | 5.4E-02 | 9.0E-02 | 2.6E-02 | 6.2E-02 | 6.4E-01 | 5.4E-01 | 3.8E-01 | 8.5E-01 | 5.2E-01 | 3.1E-01 | 8.2E-01 | 1       |    |
| 15       | 4.9E-02 | 1.5E-01 | 4.1E-01 | 1.0E-01 | 1.6E-01 | 2.8E-01 | 1.2E-01 | 1.5E-01 | 1.6E-01 | 2.2E-01 | 8.5E-02 | 1.8E-01 | 1.4E-01 | 1  |

| p-value |
|---------|
| >0.05   |
| <0.05   |
| <1E-02  |
| <1E-03  |

Global probability of observing 25 of the 91 pairwise comparisons with p<0.05: p=1.9x10<sup>-12</sup>

**Supplemental figure S10: Analysis of the distribution of co-methylation events by DNMT3A/3L.** A model assuming co-methylation occurred by independent events would predict equal probabilities of co-methylation in all distances. This model was evaluated by comparing the co-methylation frequencies by DNMT3A/3L in the different distances by pairwise T-Tests using MS Excel using two-tailed and unequal variance (heteroscedastic) settings. P-values < 0.05 were taken as evidence for a significant difference that argues against an equal probability of co-methylation at all distances. For a global analysis, the probability of finding N or more pairwise comparisons with p-values below 0.05 was determined using a binomial distribution. Overall, these data demonstrate that the distribution of co-methylation events is not in agreement with a model assuming co-methylation by independent events.

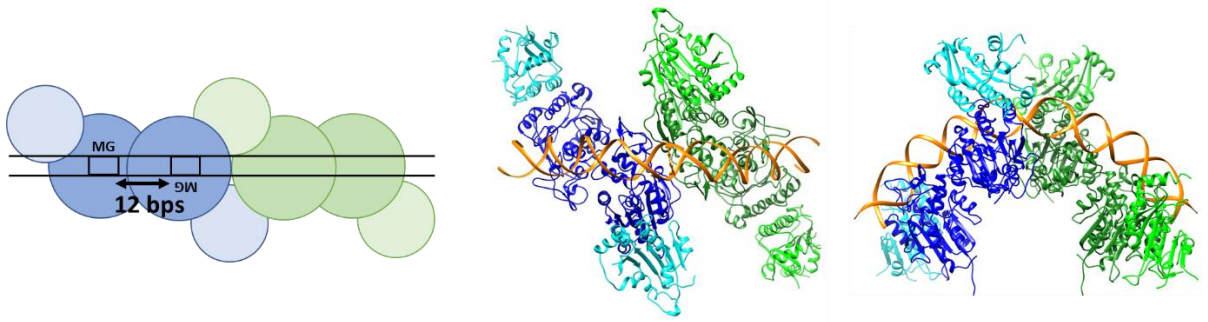

**Supplemental figure S11: Side-by-side DNMT3A/3L model explaining two tetramer complexes binding to the D12 substrate.** On the D12 substrate one DNMT3A/3L tetramer can bind to both CpG sites and a second tetramer can bind next to it on the DNA. The resulting model is identical to the side-by-side binding model presented in Figure 8C, with the exception that the binding pattern to the CpG sites is different.

## Supplemental tables

**Supplemental table S1.** Sequences of the oligonucleotide substrates used in this study.

| Distance  | Sequence                                                                        |
|-----------|---------------------------------------------------------------------------------|
| <b>2</b>  | GAGTGTGACTAGGCTCTCACTGCCNNNNNNNNNNCGNNCGNNNNNNNNNNGAGAGGAGACCTAGTGAGAAG         |
| <b>3</b>  | GAGTGTGACTAGGCTCTCACTGCCNNNNNNNNNNCGNNCGNNNNNNNNNNGAGAGGAGACCTAGTGAGAAG         |
| <b>4</b>  | GAGTGTGACTAGGCTCTCACTGCCNNNNNNNNNNCGNNCGNNNNNNNNNNGAGAGGAGACCTAGTGAGAAG         |
| <b>5</b>  | GAGTGTGACTAGGCTCTCACTGCCNNNNNNNNNNCGNNCGNNNNNNNNNNGAGAGGAGACCTAGTGAGAAG         |
| <b>6</b>  | GAGTGTGACTAGGCTCTCACTGCCNNNNNNNNNNCGNNNNNNNNCGNNNNNNNNNNGAGAGGAGACCTAGTGAGAAG   |
| <b>7</b>  | GAGTGTGACTAGGCTCTCACTGCCNNNNNNNNNNCGNNNNNNNNCGNNNNNNNNNNGAGAGGAGACCTAGTGAGAAG   |
| <b>8</b>  | GAGTGTGACTAGGCTCTCACTGCCNNNNNNNNNNCGNNNNNNNNCGNNNNNNNNNNGAGAGGAGACCTAGTGAGAAG   |
| <b>9</b>  | GAGTGTGACTAGGCTCTCACTGCCNNNNNNNNNNCGNNNNNNNNNNCGNNNNNNNNNNGAGAGGAGACCTAGTGAGAAG |
| <b>10</b> | GAGTGTGACTAGGCTCTCACTGCCNNNNNNNNNNCGNNNNNNNNNNCGNNNNNNNNNNGAGAGGAGACCTAGTGAGAAG |
| <b>11</b> | GAGTGTGACTAGGCTCTCACTGCCNNNNNNNNNNCGNNNNNNNNNNCGNNNNNNNNNNGAGAGGAGACCTAGTGAGAAG |
| <b>12</b> | GAGTGTGACTAGGCTCTCACTGCCNNNNNNNNNNCGNNNNNNNNNNCGNNNNNNNNNNGAGAGGAGACCTAGTGAGAAG |
| <b>13</b> | GAGTGTGACTAGGCTCTCACTGCCNNNNNNNNNNCGNNNNNNNNNNCGNNNNNNNNNNGAGAGGAGACCTAGTGAGAAG |
| <b>14</b> | GAGTGTGACTAGGCTCTCACTGCCNNNNNNNNNNCGNNNNNNNNNNCGNNNNNNNNNNGAGAGGAGACCTAGTGAGAAG |
| <b>15</b> | GAGTGTGACTAGGCTCTCACTGCCNNNNNNNNNNCGNNNNNNNNNNCGNNNNNNNNNNGAGAGGAGACCTAGTGAGAAG |

**Supplemental table S2:** Total number of NGS reads in the different experiments conducted with DNMT3A and DNMT3A/3L and in the no-enzyme control reaction.

| Distance | #reads    |              |             |           |           |               |              |         |
|----------|-----------|--------------|-------------|-----------|-----------|---------------|--------------|---------|
|          | no enzyme | DNMT3A       |             |           |           | DNMT3A/3L     |              | sum     |
|          |           | 0.25 $\mu$ M | 0.5 $\mu$ M | 1 $\mu$ M | 2 $\mu$ M | 0.125 $\mu$ M | 0.25 $\mu$ M |         |
| 2        | 16184     | 19162        | 16548       | 14160     | 16042     | 4262          | 3700         | 90058   |
| 3        | 18174     | 22172        | 19514       | 16776     | 18722     | 4818          | 4218         | 104394  |
| 4        | 19106     | 23128        | 20378       | 17300     | 19588     | 4820          | 4398         | 108718  |
| 5        | 28102     | 34650        | 30066       | 26402     | 29310     | 7346          | 6418         | 162294  |
| 6        | 11340     | 13682        | 11938       | 9844      | 11667     | 2674          | 2670         | 63815   |
| 7        | 15716     | 18998        | 16768       | 14382     | 16590     | 4070          | 3546         | 90070   |
| 8        | 13550     | 16614        | 14678       | 12640     | 14645     | 3350          | 3114         | 78591   |
| 9        | 13122     | 15884        | 14108       | 12070     | 13432     | 3334          | 3084         | 75034   |
| 10       | 10878     | 12700        | 11008       | 9626      | 10938     | 2690          | 2508         | 60348   |
| 11       | 14272     | 16684        | 14754       | 13180     | 14438     | 3398          | 3300         | 80026   |
| 12       | 12892     | 16340        | 14158       | 12294     | 13972     | 3406          | 2942         | 76004   |
| 13       | 12802     | 15780        | 13884       | 11860     | 13373     | 3280          | 3092         | 74071   |
| 14       | 17262     | 20558        | 17832       | 15102     | 16813     | 4404          | 4076         | 96047   |
| 15       | 14192     | 16784        | 14762       | 12742     | 14349     | 3636          | 3426         | 79891   |
| sum      | 217592    | 263136       | 230396      | 198378    | 223879    | 55488         | 50492        | 1239361 |

**Supplemental table S3:** Total number of co-methylation events in the different experiments conducted with DNMT3A and DNMT3A/3L.

DNMT3A

| Distance | 2 $\mu$ M |      |      |      | 1 $\mu$ M |      |      |      | 0.5 $\mu$ M |      |     |     | 0.25 $\mu$ M |     |     |     |
|----------|-----------|------|------|------|-----------|------|------|------|-------------|------|-----|-----|--------------|-----|-----|-----|
|          | #Seq      | #MM  | #MW  | #WM  | #Seq      | #MM  | #MW  | #WM  | #Seq        | #MM  | #MW | #WM | #Seq         | #MM | #MW | #WM |
| 2        | 16042     | 3814 | 1466 | 2001 | 14160     | 2424 | 1038 | 1185 | 16548       | 1219 | 462 | 546 | 19162        | 345 | 139 | 146 |
| 3        | 18722     | 4159 | 1374 | 2395 | 16776     | 2410 | 823  | 1315 | 19514       | 1236 | 410 | 646 | 22172        | 336 | 89  | 168 |
| 4        | 19506     | 3393 | 960  | 2244 | 17300     | 2123 | 607  | 1265 | 20378       | 1010 | 286 | 557 | 23128        | 263 | 61  | 146 |
| 5        | 29132     | 5467 | 1632 | 3661 | 26402     | 3440 | 1016 | 2114 | 30066       | 1590 | 444 | 932 | 34650        | 461 | 118 | 232 |
| 6        | 11608     | 1920 | 593  | 1385 | 9844      | 1083 | 322  | 696  | 11938       | 528  | 143 | 339 | 13682        | 153 | 40  | 92  |
| 7        | 16518     | 2965 | 1291 | 1776 | 14382     | 1818 | 804  | 960  | 16768       | 854  | 409 | 432 | 18998        | 237 | 110 | 96  |
| 8        | 14570     | 2672 | 1179 | 1632 | 12640     | 1529 | 706  | 909  | 14678       | 744  | 359 | 412 | 16614        | 205 | 122 | 99  |
| 9        | 13350     | 2572 | 1342 | 1377 | 12070     | 1565 | 896  | 748  | 14108       | 719  | 467 | 326 | 15884        | 195 | 165 | 82  |
| 10       | 10886     | 1746 | 780  | 1039 | 9626      | 979  | 504  | 544  | 11008       | 458  | 247 | 216 | 12700        | 135 | 60  | 57  |
| 11       | 14372     | 2438 | 1200 | 1279 | 13180     | 1429 | 748  | 684  | 14754       | 651  | 370 | 300 | 16684        | 176 | 97  | 68  |
| 12       | 13904     | 2385 | 1472 | 1061 | 12294     | 1454 | 1003 | 566  | 14158       | 636  | 518 | 223 | 16340        | 171 | 161 | 55  |
| 13       | 13290     | 2148 | 1451 | 844  | 11860     | 1295 | 896  | 425  | 13884       | 620  | 460 | 210 | 15780        | 166 | 118 | 47  |
| 14       | 16720     | 2302 | 1627 | 833  | 15102     | 1281 | 969  | 426  | 17832       | 614  | 541 | 202 | 20558        | 152 | 170 | 43  |
| 15       | 14276     | 2045 | 1233 | 881  | 12742     | 1202 | 794  | 456  | 14762       | 584  | 404 | 223 | 16784        | 135 | 97  | 60  |

DNMT3A/3L

| Distance | 0.25 $\mu$ M |     |     |     | 0.125 $\mu$ M |     |     |     |
|----------|--------------|-----|-----|-----|---------------|-----|-----|-----|
|          | #Seq         | #MM | #MW | #WM | #Seq          | #MM | #MW | #WM |
| 2        | 3700         | 387 | 182 | 193 | 4262          | 194 | 90  | 100 |
| 3        | 4218         | 339 | 123 | 184 | 4818          | 151 | 58  | 84  |
| 4        | 4398         | 273 | 76  | 154 | 4820          | 115 | 30  | 68  |
| 5        | 6418         | 467 | 151 | 304 | 7346          | 190 | 58  | 125 |
| 6        | 2670         | 184 | 45  | 116 | 2674          | 66  | 25  | 46  |
| 7        | 3546         | 191 | 106 | 67  | 4070          | 108 | 57  | 43  |
| 8        | 3114         | 194 | 128 | 61  | 3350          | 82  | 56  | 21  |
| 9        | 3084         | 178 | 127 | 51  | 3334          | 65  | 56  | 21  |
| 10       | 2508         | 138 | 77  | 46  | 2690          | 54  | 39  | 25  |
| 11       | 3300         | 209 | 127 | 68  | 3398          | 75  | 52  | 34  |
| 12       | 2942         | 213 | 222 | 52  | 3406          | 102 | 126 | 18  |
| 13       | 3092         | 256 | 183 | 73  | 3280          | 88  | 88  | 18  |
| 14       | 4076         | 258 | 156 | 94  | 4404          | 108 | 87  | 30  |
| 15       | 3426         | 251 | 127 | 119 | 3636          | 107 | 67  | 39  |



## Supplemental references

1. Bangalore, D.M., Heil, H.S., Mehringer, C.F., Hirsch, L., Hemmen, K., Heinze, K.G. and Tessmer, I. (2020) Automated AFM analysis of DNA bending reveals initial lesion sensing strategies of DNA glycosylases. *Sci Rep*, **10**, 15484.
2. Schneider, C.A., Rasband, W.S. and Eliceiri, K.W. (2012) NIH Image to ImageJ: 25 years of image analysis. *Nat Methods*, **9**, 671-675.
3. Ruhnnow, F., Zwicker, D. and Diez, S. (2011) Tracking single particles and elongated filaments with nanometer precision. *Biophys J*, **100**, 2820-2828.
4. Gao, L., Emperle, M., Guo, Y., Grimm, S.A., Ren, W., Adam, S., Uryu, H., Zhang, Z.M., Chen, D., Yin, J. *et al.* (2020) Comprehensive structure-function characterization of DNMT3B and DNMT3A reveals distinctive de novo DNA methylation mechanisms. *Nature communications*, **11**, 3355.
5. Rajavelu, A., Jurkowska, R.Z., Fritz, J. and Jeltsch, A. (2012) Function and disruption of DNA methyltransferase 3a cooperative DNA binding and nucleoprotein filament formation. *Nucleic Acids Res*, **40**, 569-580.
